# Supplementary material for: Impact of gender on the career development of female traditional Korean medicine doctors: a qualitative study
Source: PubMed Central journal article supplement — BMJ Open. 2019 Aug 21;9(8):e030390. doi: 10.1136/bmjopen-2019-030390 (PMC6707762; doi:10.1136/bmjopen-2019-030390), 2019-08-21
Supplement: bmjopen-2019-030390supp001.pdf [file bmjopen-2019-030390supp001.pdf]

**Supplementary Table 1. Consolidated criteria for reporting qualitative studies (COREQ): 32-item checklist**

| No                                             | Item                                     | Guide questions/description                                                                                                               | Response                                                                                                                                                                                                 |
|------------------------------------------------|------------------------------------------|-------------------------------------------------------------------------------------------------------------------------------------------|----------------------------------------------------------------------------------------------------------------------------------------------------------------------------------------------------------|
| <b>Domain 1: Research team and reflexivity</b> |                                          |                                                                                                                                           |                                                                                                                                                                                                          |
| Personal Characteristics                       |                                          |                                                                                                                                           |                                                                                                                                                                                                          |
| 1.                                             | Interviewer/facilitator                  | Which author/s conducted the interview or focus group?                                                                                    | #001, 002, 003, 004, 006, 007, 008, 009 by SEC, #005, 010 by JHL                                                                                                                                         |
| 2.                                             | Credentials                              | What were the researcher's credentials? E.g. PhD, MD                                                                                      | SEC, JEL and JHL were KM college student. SMKL, JL and HK were KMD, PhD.                                                                                                                                 |
| 3.                                             | Occupation                               | What was their occupation at the time of the study?                                                                                       | Researcher's occupations at the time of the study included student, research fellow, research professor.                                                                                                 |
| 4.                                             | Gender                                   | Was the researcher male or female?                                                                                                        | SEC, JEL, JHL and SMKL were females. JL and HK were males.                                                                                                                                               |
| 5.                                             | Experience and training                  | What experience or training did the researcher have?                                                                                      | SEC has been trained to conduct interviews and analyze data of qualitative research in specialized lecture at accredited research institution. SMKL has experience in carrying out qualitative research. |
| Relationship with participants                 |                                          |                                                                                                                                           |                                                                                                                                                                                                          |
| 6.                                             | Relationship established                 | Was a relationship established prior to study commencement?                                                                               | No, there wasn't.                                                                                                                                                                                        |
| 7.                                             | Participant knowledge of the interviewer | What did the participants know about the researcher? e.g. personal goals, reasons for doing the research                                  | Name, occupation, reasons for doing the research                                                                                                                                                         |
| 8.                                             | Interviewer characteristics              | What characteristics were reported about the interviewer/facilitator? e.g. Bias, assumptions, reasons and interests in the research topic | Name, occupation, reasons for doing the research                                                                                                                                                         |
| <b>Domain 2: Study design</b>                  |                                          |                                                                                                                                           |                                                                                                                                                                                                          |
| Theoretical framework                          |                                          |                                                                                                                                           |                                                                                                                                                                                                          |

|                       |                                       |                                                                                                                                                          |                                                             |
|-----------------------|---------------------------------------|----------------------------------------------------------------------------------------------------------------------------------------------------------|-------------------------------------------------------------|
| 9.                    | Methodological orientation and Theory | What methodological orientation was stated to underpin the study? e.g. grounded theory, discourse analysis, ethnography, phenomenology, content analysis | Constant comparative analysis method                        |
| Participant selection |                                       |                                                                                                                                                          |                                                             |
| 10.                   | Sampling                              | How were participants selected? e.g. purposive, convenience, consecutive, snowball                                                                       | Purposive sampling, snowball sampling, theoretical sampling |
| 11.                   | Method of approach                    | How were participants approached? e.g. face-to-face, telephone, mail, email                                                                              | Face to face                                                |
| 12.                   | Sample size                           | How many participants were in the study?                                                                                                                 | 10                                                          |
| 13.                   | Non-participation                     | How many people refused to participate or dropped out? Reasons?                                                                                          | 2 for personal reason                                       |
| Setting               |                                       |                                                                                                                                                          |                                                             |
| 14.                   | Setting of data collection            | Where was the data collected? e.g. home, clinic, workplace                                                                                               | A quiet and comfortable place chosen by the participant     |
| 15.                   | Presence of non-participants          | Was anyone else present besides the participants and researchers?                                                                                        | 2 interviewees with their baby                              |
| 16.                   | Description of sample                 | What are the important characteristics of the sample? e.g. demographic data, date                                                                        | Female KM doctors in their 30's                             |
| Data collection       |                                       |                                                                                                                                                          |                                                             |
| 17.                   | Interview guide                       | Were questions, prompts, guides provided by the authors? Was it pilot tested?                                                                            | Yes, they were. / Yes, it was.                              |
| 18.                   | Repeat interviews                     | Were repeat interviews carried out? If yes, how many?                                                                                                    | No, they weren't.                                           |
| 19.                   | Audio/visual recording                | Did the research use audio or visual recording to collect the data?                                                                                      | Audio recording                                             |
| 20.                   | Field notes                           | Were field notes made during and/or after the interview or focus group?                                                                                  | Yes, they were.                                             |
| 21.                   | Duration                              | What was the duration of the interviews or focus group?                                                                                                  | Average 59 minutes                                          |
| 22.                   | Data saturation                       | Was data saturation discussed?                                                                                                                           | Yes, it was.                                                |

|                                        |                                |                                                                                                                                 |                                              |
|----------------------------------------|--------------------------------|---------------------------------------------------------------------------------------------------------------------------------|----------------------------------------------|
| 23.                                    | Transcripts returned           | Were transcripts returned to participants for comment and/or correction?                                                        | Reviewed by 2 randomly selected participants |
| <b>Domain 3: Analysis and findings</b> |                                |                                                                                                                                 |                                              |
| Data analysis                          |                                |                                                                                                                                 |                                              |
| 24.                                    | Number of data coders          | How many data coders coded the data?                                                                                            | One (SEC)                                    |
| 25.                                    | Description of the coding tree | Did authors provide a description of the coding tree?                                                                           | Yes, we did.                                 |
| 26.                                    | Derivation of themes           | Were themes identified in advance or derived from the data?                                                                     | Themes were derived using both methods.      |
| 27.                                    | Software                       | What software, if applicable, was used to manage the data?                                                                      | AXQDA 2018                                   |
| 28.                                    | Participant checking           | Did participants provide feedback on the findings?                                                                              | Reviewed by 2 randomly selected participants |
| Reporting                              |                                |                                                                                                                                 |                                              |
| 29.                                    | Quotations presented           | Were participant quotations presented to illustrate the themes/findings? Was each quotation identified? e.g. participant number | Yes, there were. / Yes, there was.           |
| 30.                                    | Data and findings consistent   | Was there consistency between the data presented and the findings?                                                              | Yes, there was.                              |
| 31.                                    | Clarity of major themes        | Were major themes clearly presented in the findings?                                                                            | Yes. they were.                              |
| 32.                                    | Clarity of minor themes        | Is there a description of diverse cases or discussion of minor themes?                                                          | Yes, there is.                               |

Developed from: Tong A, Sainsbury P, Craig J. Consolidated criteria for reporting qualitative research (COREQ): a 32-item checklist for interviews and focus groups. *International Journal for Quality in Health Care*. 2007. Volume 19, Number 6: pp. 349 – 357
